# Supplementary material
Source: PubMed Central journal article supplement (PMC5027804)
Supplement: supp_WNL.0000000000002786_SUPPLEMENTAL_DATA_PAD_Study.pdf [file supp_WNL.0000000000002786_SUPPLEMENTAL_DATA_PAD_Study.pdf]

## SUPPLEMENTARY APPENDIX

### ARTICLE TITLE: Physician-Assisted Death: A Canada-Wide Survey of ALS Health Care Providers

**Table e-1. Canadian ALS Research Network (CALS) sites.**

|     | <b>Site Name</b>                                                          | <b>Location</b>             |
|-----|---------------------------------------------------------------------------|-----------------------------|
| 1.  | Centre Hospitalier de l'Université de Montréal(CHUM) / Hôpital Notre-Dame | Montreal, Quebec            |
| 2.  | CHU de Québec-Université Laval                                            | Quebec, QC                  |
| 3.  | Kingston General Hospital                                                 | Kingston, Ontario           |
| 4.  | London Health Sciences Centre                                             | London, Ontario             |
| 5.  | McMaster University                                                       | Hamilton, Ontario           |
| 6.  | Montreal Neurological Institute                                           | Montreal, Quebec            |
| 7.  | Neuro-Rive Sud                                                            | Sherbrook, Quebec           |
| 8.  | Queen Elizabeth II (QEII) Health Sciences Centre                          | Halifax, Nova Scotia        |
| 9.  | Stan Cassidy Centre for Rehabilitation                                    | Fredericton, New Brunswick  |
| 10. | The Ottawa Hospital, Rehabilitation Centre                                | Ottawa, ON                  |
| 11. | University of Alberta                                                     | Edmonton, Alberta           |
| 12. | University of British Columbia                                            | Vancouver, British Columbia |
| 13. | University of Calgary                                                     | Calgary, Alberta            |
| 14. | University of Toronto (Sunnybrook Health Sciences Centre)                 | Toronto, ON                 |
| 15. | Winnipeg Health Sciences Centre                                           | Winnipeg, MB                |

**Table e-2. Definitions used in this study.**

---

|                                          |                                                                                                                                                                                                                                                                                                                                      |
|------------------------------------------|--------------------------------------------------------------------------------------------------------------------------------------------------------------------------------------------------------------------------------------------------------------------------------------------------------------------------------------|
| <b>Physician-Assisted Suicide (PAS)</b>  | When a competent patient requests his/her doctor to prescribe a medication for the specific purpose of ending his/her life. In most cases, a lethal dosage of barbiturate is prescribed and the <u>PATIENT self-administers</u> this medication.                                                                                     |
| <b>Voluntary Active Euthanasia (VAE)</b> | When a competent patient requests his/her <u>DOCTOR to administer</u> an intravenous lethal drug for the specific purpose of ending his/her life.                                                                                                                                                                                    |
| <b>Physician-Assisted Death (PAD)</b>    | Includes both PAS and VAE as defined above.                                                                                                                                                                                                                                                                                          |
| <b>Palliative Care:</b>                  | An approach that aims to improve the quality of life of patients and their families facing the hardships associated with life-threatening illness. This includes the prevention and relief of suffering by means of early identification, assessment and treatment of pain and other problems, physical, psychosocial and spiritual. |

---

**Table e-3. Detailed description of the scenarios describing hypothetical patients with advancing degrees of ALS symptom severity and disability. For all scenarios, respondents were guided to assume that the patient were competent and had no psychiatric illness.**

---

|                                           |                                                                                                                                                                                                                                                                                                                        |
|-------------------------------------------|------------------------------------------------------------------------------------------------------------------------------------------------------------------------------------------------------------------------------------------------------------------------------------------------------------------------|
| <b>Scenario 1:<br/>Mild Stage ALS</b>     | A patient with ALS has mild distal weakness in the legs and needs a cane for walking. The patient perceives the disability as extremely severe and negatively impacting their quality of life. The patient has normal respiratory function and survival is indeterminate at this time.                                 |
| <b>Scenario 2:<br/>Moderate Stage ALS</b> | A patient has been diagnosed with ALS and has weakness in their arms and hands and needs assistance with activities of daily living (ADLs). The patient also has dysphagia, weight loss and a feeding tube is recommended. With a feeding tube, this patient's survival is estimated at greater than 6 months.         |
| <b>Scenario 3:<br/>Severe Stage ALS</b>   | A patient has been diagnosed with ALS and currently has severe breathing difficulties requiring non-invasive ventilation in the form of BiPAP for most of the day and night. The patient has severe weakness in all limbs and can only mobilize by wheelchair. This patient's expected survival is less than 6 months. |

---
